# Supplementary material for: Development of Cancer Among Patients With Pediatric-Onset Inflammatory Bowel Disease: A Meta-analysis of Population-Based Studies
Source: PubMed Central journal article supplement (PMC8889462; doi:10.1001/jamanetworkopen.2022.0595), 2022-03-01

## Supplementary Online Content

Elmahdi R, Lemser CE, Thomsen SB, Allin KH, Agrawal M, Jess T. Development of cancer among patients with pediatric-onset inflammatory bowel disease: a meta-analysis of population-based studies. *JAMA Netw Open*. 2022;5(3):e220595.  
doi:10.1001/jamanetworkopen.2022.0595

**eTable 1.** Embase Database Search Using Ovid

**eTable 2.** MEDLINE (Pubmed With MeSH Headings) Search Terms

**eFigure 1.** Newcastle-Ottawa Scale Tool Description for Assessment of Risk of Bias and Study Quality

**eFigure 2.** Forest Plots of Meta-Analyses for Relative Cancer Risk for Individuals With Pediatric-Onset IBD Compared With Reference Populations by Gastrointestinal Cancer

**eFigure 3.** Forest Plots of Meta-Analyses for Relative Cancer Risk for Individuals With Pediatric-Onset IBD Compared With Reference Populations by Extra-Intestinal Cancer

**eFigure 4.** REM Meta-Analysis of Cancer Rates in Pediatric-Onset IBD Compared With Reference Populations Excluding Olen et al. and Penau et al.

**eFigure 5.** REM Meta-Analysis of Cancer Rates in Paediatric-Onset IBD Compared With Reference Populations Including Deneau & Guthery, 2017

**eFigure 6.** Funnel Plot for Assessment for Publication Bias of Included Studies

This supplementary material has been provided by the authors to give readers additional information about their work.

**eTable 1.** Embase Database Search Using Ovid

| <b>Search Terms (Embase Ovid)</b> |                                                                                                       |                                                                                                                           |                                                                                                                    |                                                     |
|-----------------------------------|-------------------------------------------------------------------------------------------------------|---------------------------------------------------------------------------------------------------------------------------|--------------------------------------------------------------------------------------------------------------------|-----------------------------------------------------|
|                                   | <b>1</b>                                                                                              | <b>2</b>                                                                                                                  | <b>3</b>                                                                                                           | <b>4</b>                                            |
| Search Terms                      | Malignant neoplasm                                                                                    | Inflammatory Bowel Diseases                                                                                               | Pediatrics<br>Juvenile<br>Adolescent<br>Child                                                                      | Epidemiology<br>Cohort analysis                     |
| Free text                         | Cancer*<br>Neoplasm*<br>Neoplasia<br>Adenocarcinoma<br>Carcinoma<br>Malignancy<br>Tumour* /<br>Tumor* | Inflammatory Bowel Disease*<br>IBD*<br>Crohn<br>Crohn's Disease<br>Morbus Crohn<br>Colitis Ulcerosa<br>Ulcerative colitis | Pediatric /<br>Paediatric<br>Early onset /<br>Early-onset<br>Children<br>Child<br>Adolescent<br>Juvenile<br>Infant | Cohort analysis<br>Cohort study<br>Population based |

**eTable 2.** MEDLINE (Pubmed With MeSH Headings) Search Terms

| <b>Subject headings (MEDLINE PubMed)</b> |                                                                                                               |                                                                                                                                                                              |                                                                                                                                                                                                       |                                                                                                          |
|------------------------------------------|---------------------------------------------------------------------------------------------------------------|------------------------------------------------------------------------------------------------------------------------------------------------------------------------------|-------------------------------------------------------------------------------------------------------------------------------------------------------------------------------------------------------|----------------------------------------------------------------------------------------------------------|
|                                          | <b>1</b>                                                                                                      | <b>2</b>                                                                                                                                                                     | <b>3</b>                                                                                                                                                                                              | <b>4</b>                                                                                                 |
| Subject headings                         | Malignant neoplasm                                                                                            | Inflammatory Bowel Diseases                                                                                                                                                  | Pediatrics<br>Juvenile<br>Adolescent<br>Child                                                                                                                                                         | Epidemiology<br>Cohort analysis                                                                          |
| Free text                                | ("Neoplasms"[MeSH] OR Cancer* OR Neoplasia OR Adenocarcinoma OR Carcinoma OR Malignancy OR Tumour* OR Tumor*) | ("Inflammatory Bowel Diseases"[MeSH] OR "Inflammatory Bowel Disease*" OR IBD* OR Crohn OR "Crohn's Disease" OR "Morbus Crohn" OR "Colitis Ulcerosa" OR "Ulcerative colitis") | ("Infant"[MeSH] OR "Child, Preschool"[MeSH] OR "Child"[MeSH] OR "Adolescent"[MeSH] OR Pediatric OR Paediatric OR Early onset OR Early-onset OR Children OR Child OR Adolescent OR Juvenile OR Infant) | ("Epidemiology"[MeSH] OR "Cohort analysis"[MeSH] OR Cohort analysis OR Cohort study OR Population based) |

## RISK OF BIAS AND QUALITY ASSESSMENT:

**eFigure 1.** Newcastle-Ottawa Scale Tool Description for Assessment of Risk of Bias and Study Quality

### Newcastle-Ottawa Quality Assessment Form for Cohort Studies

Note: A study can be given a maximum of one star for each numbered item within the Selection and Outcome categories. A maximum of two stars can be given for Comparability.

#### Selection

- 1) Representativeness of the exposed cohort
  - a) Truly representative (*one star*)
  - b) Somewhat representative (*one star*)
  - c) Selected group
  - d) No description of the derivation of the cohort
- 2) Selection of the non-exposed cohort
  - a) Drawn from the same community as the exposed cohort (*one star*)
  - b) Drawn from a different source
  - c) No description of the derivation of the non exposed cohort
- 3) Ascertainment of exposure
  - a) Secure record (e.g., surgical record) (*one star*)
  - b) Structured interview (*one star*)
  - c) Written self report
  - d) No description
  - e) Other
- 4) Demonstration that outcome of interest was not present at start of study
  - a) Yes (*one star*)
  - b) No

#### Comparability

- 1) Comparability of cohorts on the basis of the design or analysis controlled for confounders
  - a) The study controls for age, sex and marital status (*one star*)
  - b) Study controls for other factors (list) \_\_\_\_\_ (*one star*)
  - c) Cohorts are not comparable on the basis of the design or analysis controlled for confounders

#### Outcome

- 1) Assessment of outcome
  - a) Independent blind assessment (*one star*)
  - b) Record linkage (*one star*)
  - c) Self report
  - d) No description
  - e) Other
- 2) Was follow-up long enough for outcomes to occur
  - a) Yes (*one star*)
  - b) No

Indicate the median duration of follow-up and a brief rationale for the assessment above: \_\_\_\_\_

- 3) Adequacy of follow-up of cohorts
  - a) Complete follow up- all subject accounted for (*one star*)
  - b) Subjects lost to follow up unlikely to introduce bias- number lost less than or equal to 20% or description of those lost suggested no different from those followed. (*one star*)
  - c) Follow up rate less than 80% and no description of those lost
  - d) No statement

Thresholds for converting the Newcastle-Ottawa scales to AHRQ standards (good, fair, and poor):

**Good quality:** 3 or 4 stars in selection domain AND 1 or 2 stars in comparability domain AND 2 or 3 stars in outcome/exposure domain

**Fair quality:** 2 stars in selection domain AND 1 or 2 stars in comparability domain AND 2 or 3 stars in outcome/exposure domain

**Poor quality:** 0 or 1 star in selection domain OR 0 stars in comparability domain OR 0 or 1 stars in outcome/exposure domain

## META-ANALYSES

**eFigure 2.** Forest Plots of Meta-Analyses for Relative Cancer Risk for Individuals With Pediatric-Onset IBD Compared With Reference Populations\* by Gastrointestinal Cancer

A. Colorectal cancer, B. Small bowel cancer, and C. Liver cancers

### A: Colorectal cancer

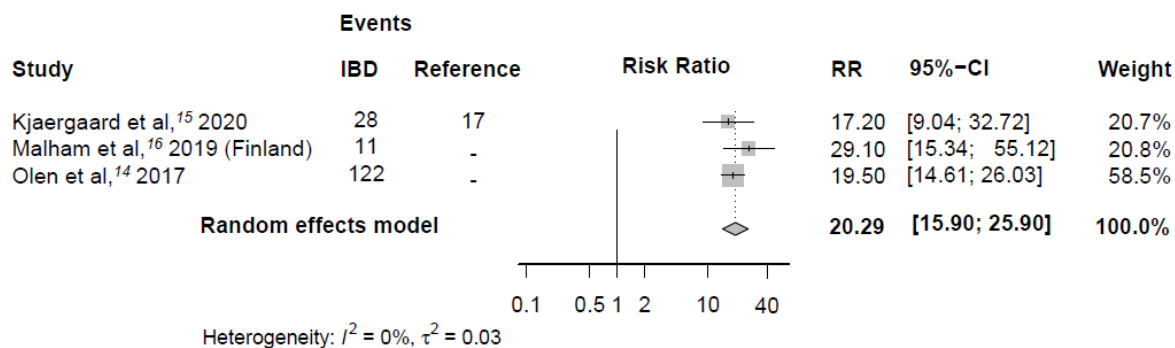

### B: Small bowel cancer

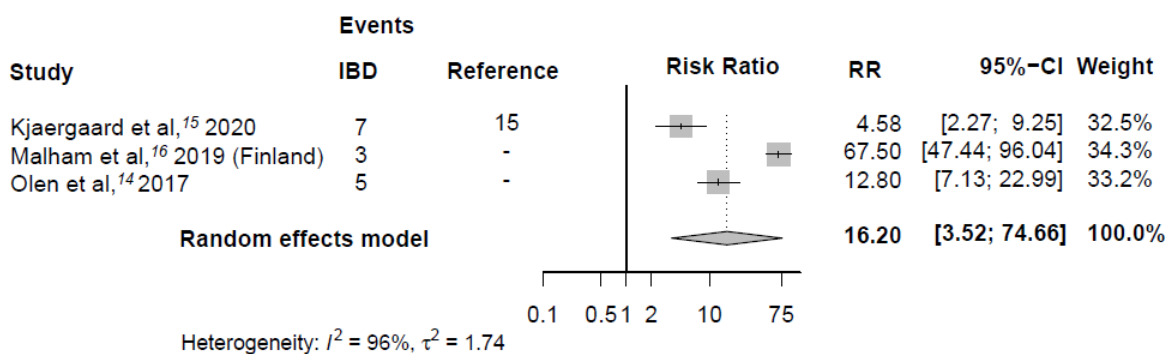

### C: Liver cancers

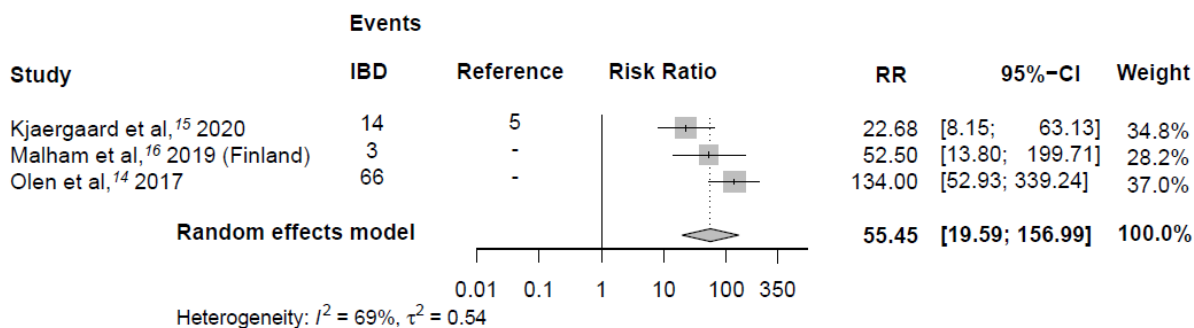

\*Including data from Kjaergaard et al., Malham et al. and Olen et al.

**eFigure 3.** Forest Plots of Meta-Analyses for Relative Cancer Risk for Individuals With Pediatric-Onset IBD Compared With Reference Populations\* by Extra-Intestinal Cancer

A. Lymphoid cancers, B. Non-melanoma skin cancer and C. Melanoma skin cancer

**A: Lymphoid cancers**

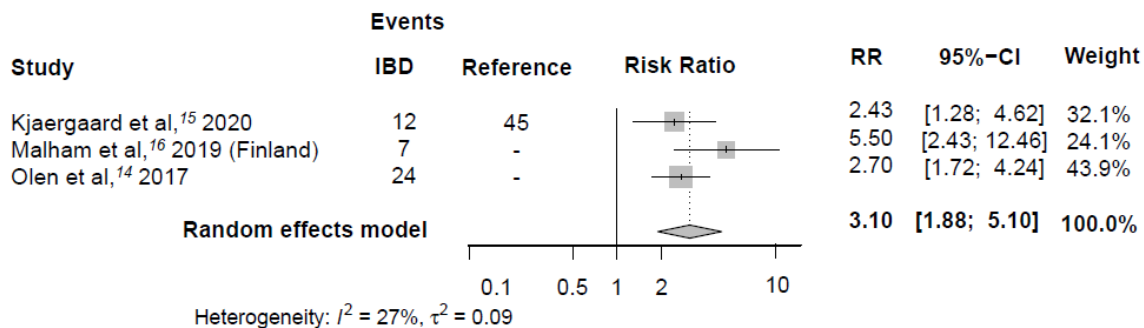

**B: Non-Melanoma skin cancer**

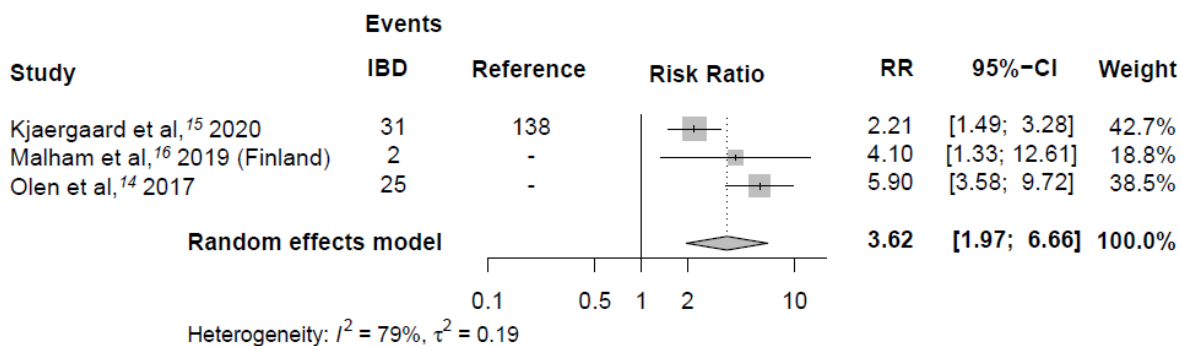

**C: Melanoma skin cancer**

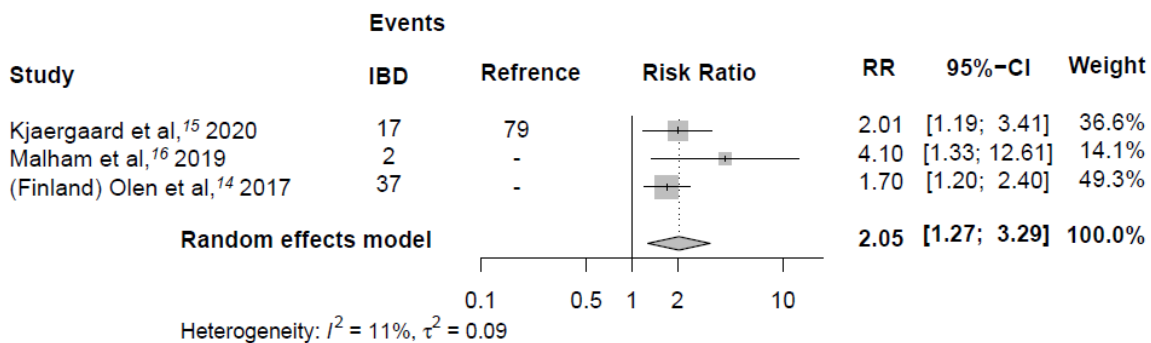

\*Including data from Kjaergaard et al., Malham et al. and Olen et al.

**eFigure 4.** REM Meta-Analysis of Cancer Rates in Pediatric-Onset IBD Compared With Reference Populations Excluding Olen et al. and Penau et al.

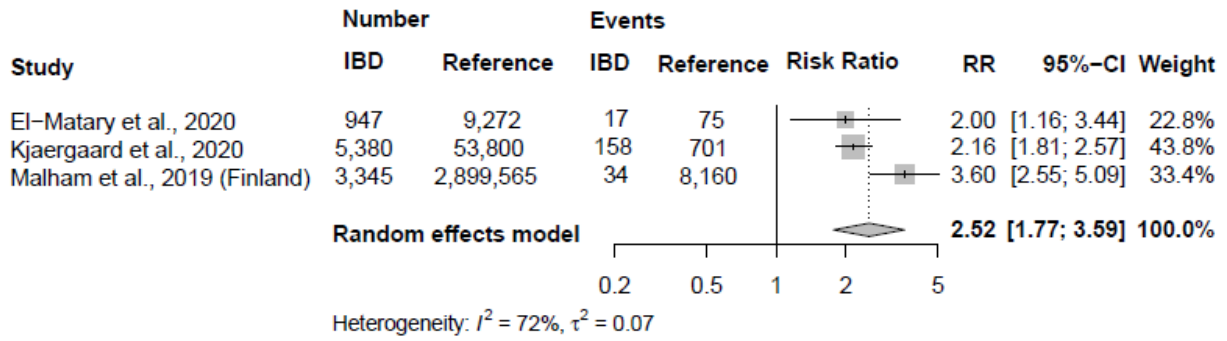



**eFigure 5.** REM Meta-Analysis of Cancer Rates in Paediatric-Onset IBD Compared With Reference Populations Including Deneau & Guthery, 2017

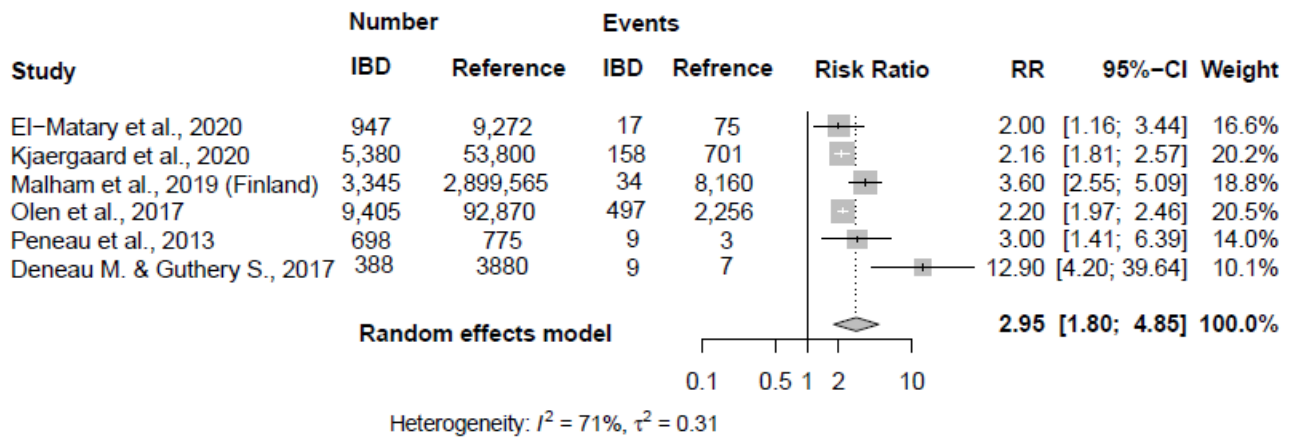

**eFigure 6.** Funnel Plot for Assessment for Publication Bias of Included Studies

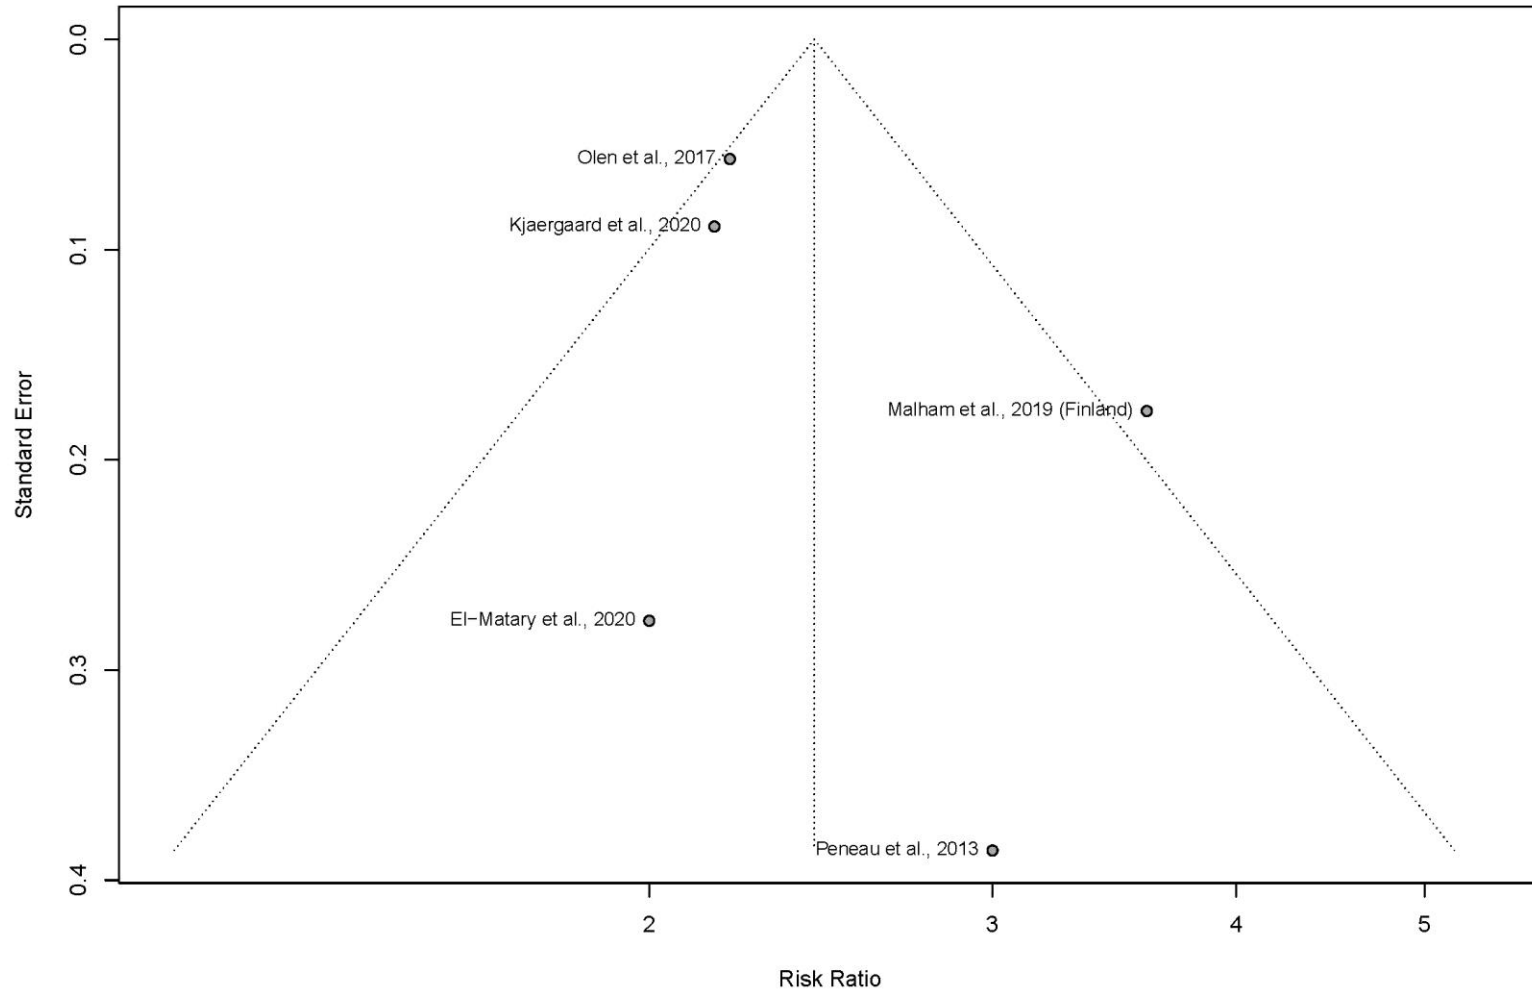

Supplement: jamanetwopen-e220595-s001.pdf [file jamanetwopen-e220595-s001.pdf]
